# Supplementary material
Source: publisher figshare collection journal article supplement (https://karger.figshare.com/ndownloader/files/15458756)
Supplement: Supplementary file 1 [file 15458756]

## **SUPPLEMENTARY INFORMATION**

### **Towards a rational and efficient diagnostic approach in children referred for growth failure to the general paediatrician**

Jan M. Wit<sup>1</sup>, Gerdine A. Kamp<sup>2</sup>, Wilma Oostdijk<sup>1</sup>, on behalf of the Dutch Working Group on Triage and Diagnosis of Growth disorders in children

<sup>1</sup> Department of Paediatrics, Leiden University Medical Center, Leiden, the Netherlands

<sup>2</sup> Department of Paediatrics, Tergooi Hospital, Blaricum, the Netherlands

## 1. Procedures

The guideline was constructed according to national guidelines based on the AGREE II instrument (Appraisal of Guidelines for Research & Evaluation II) [1]. In the preparatory phase an inventory of the bottlenecks was made by the chair and secretary of the working group in collaboration with representatives of various patient support groups. Based on this inventory, draft starting questions were formulated by chair and secretary of the working group in collaboration with the advisor from the Netherlandish Knowledge Institute of Medical Specialists, which were discussed within the working group and confirmed. Per starting question outcome measures were chosen which were considered relevant for the patients. The starting questions were then transformed into sub-modules, which were transformed to so-called PICO's (Patient-Intervention-Comparison-Outcome).

This guideline refers to children who either present with short stature (SS), growth faltering (GF), or a combination of both (SS/GF). For efficiency reasons, in the main document as well as in this Supplementary Information, we have chosen to use the abbreviation GF for growth failure, which should be read as short stature and/or growth faltering.

The general starting question read as follows: "What should be discussed and done during the first consultation by the paediatrician seeing a child referred for GF, and which investigations should be performed?" This general question was further subdivided into three questions: 1) what are the elements that should be met when taking a medical history from a child and its parents?; 2) what are the necessary elements of the physical examination and assessment of the growth curve?; and 3) which additional investigations are indicated?

Submodules and corresponding search questions and PICO's included the following:

1. In which children and adolescents (0-18 years) referred for GF are additional examinations and investigations indicated? Search question: Should in children referred for GF, in whom the medical history and physical examination by the paediatrician did not show any clue for a pathological cause, still additional investigations be performed?

**P:** patients referred to a paediatrician because of GF, in whom no abnormalities were found at medical history and physical examination

**I:** screening panel of hand radiograph and laboratory investigations aimed at detecting subclinical pathological causes that may be associated with apparent isolated short stature

**C:** no or alternative screening

**O:** relevant outcome for patients, e.g. timely diagnosis and treatment with gluten-free diet (if coeliac disease is detected), levothyroxine treatment (if hypothyroidism is detected), growth hormone treatment (if growth hormone deficiency, Turner syndrome, *SHOX* haploinsufficiency or small for gestational age without catch-up (SGA) is detected), diet and medication (if inflammatory bowel disease is detected), operation (if a brain tumour is detected), etc.

2. What is the value of chromosomal investigation to diagnose or exclude Turner syndrome in girls with short stature?

**P:** girls with GF referred to the paediatrician in whom no abnormalities are found at medical history and physical examination

**I:** chromosomal investigation

**C:** no chromosomal investigation, possibly clinical follow-up, e.g. progression of puberty

**O:** diagnostic yield, sensitivity, specificity, positive and negative predictive value.

3. What is the value of investigation of *SHOX* haploinsufficiency in children referred for GF?

**P:** children with GF referred to the paediatrician in whom no clinical features are observed that suggest a pathological cause

**I:** genetic analysis of the *SHOX* gene and enhancer regions through MLPA and Sanger sequencing

**C:** no genetic analysis, possible clinical follow-up, e.g. by checking for the appearance of disproportion and/or Madelung deformity

**O:** diagnostic yield, sensitivity, specificity, positive and negative predictive value.

4. What is the value of investigations aimed at detecting anaemia, renal failure, serum electrolyte disturbances, calcium-phosphate disorders, hypothyroidism, growth hormone deficiency and inflammatory disorders as screening in children referred for GF?

**P:** children with GF referred to the paediatrician in whom no clinical features are observed that suggest a pathological cause

**I:** screening tests for anaemia, renal failure, serum electrolyte disturbances, calcium-phosphate disorders, hypothyroidism, growth hormone deficiency and inflammatory disorders

**C:** no testing, possibly clinical follow-up

**O:** diagnostic yield, sensitivity, specificity, positive and negative predictive value.

#### Literature search and selection

For each of these PICO's a literature search was carried out in the databases Medline, Embase and the Cochrane Library with relevant search terms (details can be provided on request). Selection criteria were the following: Period: dependent on PICO; Study design: systematic review, RCT or other similar studies. Language of full text: English or Dutch. A preselection was made based on title and abstract by two members of the working group. After reading the full texts, a definitive selection was made.

Results:

PICO 1: published between January 2017 and July 2017. Preselection 70 abstracts. If all components of the PICO were retained, all were excluded. After leaving out the C component of the PICO, 16 papers were retained, showing results of laboratory screening in children referred for GF. An additional 23 papers were used for information on height SDS and clinical features of various pathological causes of GF.

PICO 2: published between January 1987 and July 2017. Preselection of 24 abstracts; 22 were excluded after reading the full text.

PICO 3: published between January 1987 and January 2018. Preselection of 18 abstracts; 16 were excluded after reading the full text.

PICO 4: published between January 1946 and July 2017. Preselection of 34 abstracts; all were excluded after reading the full text.

Additional papers published between July 2017 and December 2018 were collected through similar search terms.

After consultation of various other specialist societies (Clinical Genetics, Primary Youth Health Care, Internal Medicine, Clinical Chemistry/Laboratory Medicine) a revised version of the guideline was authorized in November 2018. In the coming years, implementation of the guideline will take place.

Further information (in Dutch language) via the following link:

<https://www.nvk.nl/Kwaliteit/Richtlijnen-overzicht/Details/articleType/ArticleView/articleId/741>

## 2. Definitions

While there is no strict dividing line between normal and abnormal linear growth, it is still helpful to define the limits of what the clinician should consider statistically “normal” or “abnormal” for each of the three parameters of growth: height compared to the population, height compared to parental heights (a proxy for genetic variants affecting height) and the longitudinal pattern of growth.

### Growth diagrams

Regarding the interpretation of the child’s height in comparison to the background population, the first step is to decide which growth diagram should be used. For countries with a homogeneous population in which nation-wide growth studies are performed regularly, the clinician does not have to think hard. However, many countries are far from homogeneous in terms of ethnicity, and in many countries no recent nation-wide growth studies are available. Under these circumstances, the clinician has to make a choice which growth reference is most suitable for the individual child presenting at the clinic. For example, in the Netherlands there is a relatively large percentage of children of Moroccan or Turkish origin, who are considerably shorter than children from families of “originally Dutch” origin [2-4] (disregarding the fact that the Dutch population is a mix of immigrants when one considers a longer time span). Like for other immigrant groups in the world [5], secular change has been rapid (2-3 cm per 13 years) for Moroccan and Turkish children [4], while the secular change in children and adults of Dutch origin has stopped [6], illustrating that information on ethnicity as well as secular change is needed for a rational choice of the most appropriate growth diagram for a certain child. If no specific growth chart is suitable for a child, the “global” growth chart developed by WHO [7, 8] can be used, which is approximately halfway the national growth charts of the tallest and shortest nations [9].

After choosing the most suitable reference population, the next step is to convert the height measurement in cm to an indicator independent of age and gender, which is usually done by expressing height as SDS (HSDS). Its conventional limits of normality are -2 and +2, so that a  $HSDS < -2$  is considered as “short stature” (SS). This implies that 2.3% of a group of (assumed) normal children is labelled “short”.

### Target height

Comparing a child’s height with parental heights is an important next step, but there is no agreement on how this should be assessed best [10]. Tanner developed the concept of target height (TH) [11], which was defined as the gender corrected average of parental heights. It is considered an indicator of the parental genetic information regarding linear growth, under the assumption of equal contribution of genetic variants from both parents. In the original equation, a mean difference of 12 cm was used between male and female height, so that TH was defined as  $[\text{paternal height} + \text{maternal height} + \text{or } -12]/2$  for a boy and girl, respectively. In most population growth studies in western countries the average difference between male and female adult height is 13 cm, so that in the equation 12 cm is usually replaced by 13 cm. Tanner rightly advocated that an additional correction should be made for secular change, but in practice this has rarely been done.

In 1986 Hermanussen and Cole argued that adjustment is needed for the association between a child’s height and parental height, and for the association between paternal and maternal height

(assortative mating). They proposed the use of the conditional TH (cTH) SDS, which is defined by 0.72 times the average of parental height SDS [12], and calculated that the height of 95% of children should be in the range of  $cTH \pm 1.6 SD$ . This formula was consistent with observational data of the Fifth Dutch Growth Study (though a factor 0.75 fitted the data better) [13]. The use of the cTH was advocated in the consensus document on idiopathic short stature (ISS) [14] and is routinely calculated in the electronic patient record system in Dutch hospitals. However, various alternative formulas have been reported, for example by investigators in the United Kingdom [10] and Finland [15]. In this mini-review we use the term target height (TH) and THSDS for any equations used. Since the discovery of many autosomal dominant growth disorders in the last decades, it is not only useful to assess TH, but also to assess separate HSDS of both parents.

### Longitudinal growth

Decisions about (ab)normality of longitudinal growth are even more difficult than the two other parameters. Traditionally, as a legacy of the work by Tanner, height velocity (HV) in cm/year has been used as primary indicator for normal or abnormal growth [16]. However, its dependency of age and HSDS position (and slightly of sex) would imply that one single cut-off over the whole paediatric age period would be of little use. In theory, this problem could be partially obviated by calculating HV SDS for age and gender [17], but the disadvantage of such approach is that longitudinal growth studies were performed many decades ago on relatively small cohorts [18-21]. Furthermore, HV SDS is still dependent on HSDS and has shown to be age dependent in response to GH treatment as well [17].

We favour the use of the change of HSDS over time (delta HSDS,  $\Delta HSDS$ ) as parameter of longitudinal growth. This indicator is based on the observation that in healthy children HSDS remains relatively stable between 2 and 10 years of age, a phenomenon called “canalization” of growth [22]. Since the individual “channel” can show fluctuations [20, 23] and deviations associated with tempo of maturation, the challenge is to define the normal range for these fluctuations or deviations, adjusted for age and time interval. In the absence of computerized referral algorithms as used in Finland [15], the Dutch guideline for referrals of children with GF proposed a cut-off of a  $\Delta HSDS < -1$  over an undetermined time interval in combination with short stature for the population. This guideline showed acceptable specificity [24, 25], though at the expense of a sensitivity of approximately 50% in GHD and Turner syndrome [25]. Based on the Swedish growth study s [20] a cut-off of a  $\Delta HSDS$  of -0.5 over a 1-2 year interval and of -0.6 to -0.9 over 3-4 years would be statistically abnormal, but the specificity in a field study has not been studied.

Before the age of 2 years, HSDS can shift up- or downwards, depending on the mutual relationship between birth length SDS and THSDS (length SDS is expected to move into the direction of THSDS). After the age of 10 years height SDS can either increase or decrease depending on onset and tempo of puberty, so that  $\Delta HSDS$  should be interpreted in the context of pubertal development and THSDS.

### Idiopathic short stature

Besides clarity about definitions of growth parameters, it would also be helpful if there would be consensus about the terminology of unusually short stature or slow growth for which no pathological cause can be found in spite of a detailed clinical assessment including radiologic and laboratory investigations. Conventionally, two “variants of normal growth” have been described [familial short stature and constitutional delay of growth and puberty (CDGP)], that are assumed to be diagnosed

without further investigations [16]. In contrast, already in 1996 [26] the conclusion of a “consensus” meeting was to replace these terms by a single term that would not imply “normality” but rather “unknown cause”: “idiopathic short stature” (ISS). ISS is further subcategorised into familial and non-familial (within or below TH range), each further subdivided into normal or delayed puberty [14, 26-29]. Children with non-familial ISS and delayed pubertal onset, traditionally labelled “constitutional delay of growth and puberty” (CDGP), should thus be considered a subcategory of ISS rather than a separate entity.

It is assumed that in most children with familial ISS their short stature is of polygenic origin, i.e. associated with inherited multiple relatively frequent genetic variants (polymorphisms) [30] and/or somewhat less frequent variants with stronger negative effects on growth [31]. However, the relatively high prevalence of autosomal dominant growth disorders and the fact that short individuals tend to marry short spouses, suggests that short children with apparent familial ISS may well carry dominant monogenic defects. Consequently, the diagnostic yield of monogenic gene defects may be higher in children with familial ISS than in other short children, especially if one of the parents is dysmorphic or disproportionate [32].

**Supplementary Table 1. Selected primary growth disorders, which can present with (apparent) isolated short stature**

| Diagnosis, ICPED code (MIM code)                            | Incidence/yr (I)<br>Prevalence (P)<br>Prevalence in referred short children (Pr) | Clinical features                                                                                                                                                                                                                                                                                                                                                                                                                                                                                                                                                                                                                                                       |
|-------------------------------------------------------------|----------------------------------------------------------------------------------|-------------------------------------------------------------------------------------------------------------------------------------------------------------------------------------------------------------------------------------------------------------------------------------------------------------------------------------------------------------------------------------------------------------------------------------------------------------------------------------------------------------------------------------------------------------------------------------------------------------------------------------------------------------------------|
| Turner syndrome~<br>1A.1a.21                                | I: 10-50/100,000<br>P: 50/100,000 [33, 34]<br>Pr: 2.3-2.7% (girls) [35, 36]      | For full list, see [37]<br><b>General:</b> hypertension<br><b>Skin:</b> pigmented naevi<br><b>Head/neck:</b> strabismus, epicanthus, ptosis, narrow mandibula, dysmorphic or rotated ears, low posterior hairline, webbed neck<br><b>Thorax:</b> broad chest, inverted/hypoplastic or wide-spaced nipples, pectus excavatum, cardiac murmur (aortic coarctation)<br><b>Skeleton/muscles:</b> scoliosis, hip dislocation, knee disorder, cubitus valgus or ulnar dislocation<br><b>Hand/foot:</b> lymphoedema of hands and feet, nail hypoplasia/dystrophy<br><b>Comorbidities:</b> Increased risk of coeliac disease, hypothyroidism, horseshoe kidney, ovarian failure |
| Mixed gonadal dysgenesis (45,X/46,XY mosaicism)<br>1A.1a.15 | I: 1.5 per 10,000 live births [38]                                               | Clinical stigmata of Turner syndrome. Genital phenotype varies widely probably reflecting gonadal developmental disorders. The gonads include bilateral streaks, bilateral dysgenetic testes, or a dysgenetic testis on one side and a streak gonad on the other. Intermediate risk of germ cell malignancy [38].                                                                                                                                                                                                                                                                                                                                                       |
| Neurofibromatosis type 1 (NF1)<br>1A.1a.16 (#162200)        | P: 1/2500-3000 [39]<br>Pr: 0.2-2.3%^                                             | <b>Skin:</b> café-au-lait spots, melanotic freckling, neurofibromas<br><b>Head:</b> macrocephaly, Lisch Noduli (eye)<br><b>Skeleton/muscles:</b> scoliosis<br><b>(Co)morbidities:</b> optic gliomas, epilepsy<br><b>Development:</b> Learning disabilities of varying severity                                                                                                                                                                                                                                                                                                                                                                                          |
| Noonan syndrome~<br>1A.1a.17 (#163950)                      | P: 1/1000-2500 [40-42]                                                           | <b>Head/neck:</b> broad forehead, ptosis, hypertelorism, downslanting palpebral fissures, a high-arched palate, and low-set, posteriorly rotated ears, webbed neck<br><b>Thorax:</b> pectus carinatum/excavatum, cardiac murmur (pulmonalis stenosis)<br><b>Genitalia:</b> cryptorchidism                                                                                                                                                                                                                                                                                                                                                                               |
| Prader-Willi (-Labhart) syndrome~<br>1A.1a.18 (#176270)     | P: 1/5525 [43]                                                                   | Diminished foetal activity, obesity, muscular hypotonia, developmental delay, short stature, hypogonadotropic hypogonadism, small hands and feet.                                                                                                                                                                                                                                                                                                                                                                                                                                                                                                                       |
| Silver-Russell syndrome (SRS)<br>1A.1a.20 (#180860)         | I: 1:30,000-100,000 [44]                                                         | "A distinct syndromic growth disorder in which prenatal and postnatal growth failure are associated with other characteristic features, including relative macrocephaly at birth, protruding forehead in early life, body asymmetry and substantial feeding difficulties. Almost all children with SRS are born SGA. Postnatal catch-up growth is not seen in the majority of children with SRS"                                                                                                                                                                                                                                                                        |

|                                                                                                      |                                                                            |                                                                                                                                                                                                                                                                                                                                                                                                                          |
|------------------------------------------------------------------------------------------------------|----------------------------------------------------------------------------|--------------------------------------------------------------------------------------------------------------------------------------------------------------------------------------------------------------------------------------------------------------------------------------------------------------------------------------------------------------------------------------------------------------------------|
|                                                                                                      |                                                                            | [44].                                                                                                                                                                                                                                                                                                                                                                                                                    |
| Skeletal dysplasias multiple, e.g. achondroplasia~ (#100800) and hypochondroplasia (#146000) 1A.3a.2 | <u>Achondroplasia:</u><br>P:0.13-0.64/10,000 [45]<br>Pr: 1-9% <sup>^</sup> | <u>Achondroplasia:</u> Short stature caused by rhizomelic shortening of the limbs, characteristic facies with frontal bossing and midface hypoplasia, exaggerated lumbar lordosis, limitation of elbow extension, genu varum, and trident hand [46]<br><u>Hypochondroplasia:</u> Short-limbed dwarfism, lumbar lordosis, short and broad bones, and caudal narrowing of the interpediculate distance of the lumbar spine |
| Heterozygous <i>SHOX</i> defects (including Leri-Weill syndrome)~ 1A.3c.1 (#300582)                  | Pr: 3.8-16.9% [47, 48]                                                     | Short stature, mesomelia (short forearm and lower leg), Madelung wrist deformity, cubitus valgus, high-arched palate, muscular hypertrophy [49]                                                                                                                                                                                                                                                                          |
| Heterozygous <i>NPR2</i> defects 1A.3c.88 (#616255)                                                  | Pr: 0-6% (weighted mean 2.0%) [50-55]                                      | Disproportionate short stature and/or phenotypic or radiographic indicators similar to <i>SHOX</i> deficiency [52]                                                                                                                                                                                                                                                                                                       |
| Heterozygous <i>ACAN</i> defects 1A.3c.88 (#165800)                                                  | Pr: 1-2.5% [55-58]                                                         | Phenotypic spectrum ranging from mild and proportionate short stature to a mild skeletal dysplasia with disproportionate short stature and brachydactyly. Many affected individuals develop early-onset osteoarthritis and degenerative disc disease [59]                                                                                                                                                                |
| Heterozygous <i>IHH</i> defects 1A.3c.88 (#112500)                                                   | Pr: 0.5-3% [55, 60]                                                        | Mild disproportional short stature with a frequent finding of shortening of the middle phalanx of the fifth finger [60]                                                                                                                                                                                                                                                                                                  |
| Heterozygous <i>NPPC</i> defects (*600296)                                                           | Pr: 0.3% [61]                                                              | Proportionate short stature, small hands, short 4 <sup>th</sup> metacarpal, hypertelorism                                                                                                                                                                                                                                                                                                                                |
| Copy number variants 1A.1y                                                                           | Pr: 13% [62]                                                               | Variable                                                                                                                                                                                                                                                                                                                                                                                                                 |
| Idiopathic SGA without catch-up growth~ 1A.2                                                         | Pr: 0.2-17% <sup>^</sup>                                                   | Variable                                                                                                                                                                                                                                                                                                                                                                                                                 |

For syndromes, MIM codes are added [34]

~ for more details, see [16]

<sup>^</sup>Percentages based on studies presenting data on diagnostic yield in short children referred to a paediatrician [63-73] (the paper of Lashari et al added a summary of papers by Lindsay et al (1994), Moayeri et al(2004), Bhadada et al (2003) and Colaco et al (1991)).



**Supplementary Table 2. Selected secondary growth disorders, which can present with (apparent) isolated short stature**

| Diagnosis and ICPED code          | Incidence/yr (I)<br>Prevalence (P)<br>Prevalence in referred short children (Pr)                                                                                                               | Clinical features                                                                                                                                                                                       |
|-----------------------------------|------------------------------------------------------------------------------------------------------------------------------------------------------------------------------------------------|---------------------------------------------------------------------------------------------------------------------------------------------------------------------------------------------------------|
| GH deficiency#                    | Total GHD:<br>P: 1:5000 [74]<br>Pr: 1-27%<br><u>GHD due to PSIS*</u> :<br>I: 1:4,000-10,000<br>P/14.7-27/100,000<br><u>Craniopharyngioma*</u> :<br>I: 0.13-2.0/100,000,<br>P: 1-3/100,000 [34] | Prominent forehead, midfacial hypoplasia, high-pitched voice, lobulated abdominal fat, increased BMI, delayed bone age                                                                                  |
| GH Insensitivity (Laron syndrome) | ?                                                                                                                                                                                              | Clinical hyposomatotropism manifest by short stature, delayed bone age, occasionally blue sclerae and hip degeneration; delayed bone maturation, low IGF1 despite normal or increased levels of GH [46] |
| Hypothyroidism#                   | Pr: 0.3-15%^                                                                                                                                                                                   | Fatigue, constipation, slow heart rate, slow release of Achilles tendon reflex                                                                                                                          |
| Cushing syndrome#                 | Pr: 0%^                                                                                                                                                                                        | Increased appetite, hirsutism, buffalo hump, striae, red cheeks, hypertension, increasing BMI SDS                                                                                                       |
| Coeliac disease*                  | I: 10-17.4/100,000<br>P: 1:270-1000 [34]<br>Pr: 0.3-15%^                                                                                                                                       | Distended abdomen, abnormal defaecation, anaemia, skin abnormalities                                                                                                                                    |
| Inflammatory bowel disease (IBD)# | <u>Crohn*</u> :<br>I: 5-9.4/100,000<br>P: 40-124/100,000 [34]                                                                                                                                  | Intestinal symptoms (abdominal pain, diarrhoea), weight loss.                                                                                                                                           |
| Haemoglobinopathy                 | ?                                                                                                                                                                                              | Anaemia                                                                                                                                                                                                 |
| Chronic renal failure#            | <u>infantile cystinosis*</u> :<br>I: 0.5-1/100,000<br>P: 0.5/100,000<br><u>juvenile nephronophthisis*</u> :<br>I: 0.1-2/100,000 [34]                                                           | Hypertension, fatigue                                                                                                                                                                                   |
| Metabolic bone disorders          | ?                                                                                                                                                                                              | Variable. Hepatomegaly.                                                                                                                                                                                 |
| Psychosocial causes               | ?                                                                                                                                                                                              | Variable                                                                                                                                                                                                |
| Iatrogenic causes (medication)    | ?                                                                                                                                                                                              | Variable                                                                                                                                                                                                |
| Other                             | ?                                                                                                                                                                                              | Variable                                                                                                                                                                                                |

\* considered as “priority target conditions” [34]

# For more details, see[16]

^Percentages based on all available studies presenting data on diagnostic yield in short children referred to a paediatrician [63-73] (the paper of Lashari et al included a summary of papers by Lindsay et al (1994), Moayeri et al(2004), Bhadada et al (2003) and Colaco et al (1991))

**Supplementary Table 3. Special points of attention in the physical examination of the child with growth failure**

| <b>Check</b>                                                     | <b>Interpretation</b>                                                                                                                                                                                                                                                                                                                                  |
|------------------------------------------------------------------|--------------------------------------------------------------------------------------------------------------------------------------------------------------------------------------------------------------------------------------------------------------------------------------------------------------------------------------------------------|
| <b>Auxology</b>                                                  |                                                                                                                                                                                                                                                                                                                                                        |
| Length or height                                                 | Calculate height SDS and distance to TH SDS. Calculate change of height SDS over time intervals                                                                                                                                                                                                                                                        |
| Sitting height, arm span                                         | In most dominant (heterozygous) mild forms of skeletal dysplasias mean sitting height/height ratio SDS varies between +1.6 and +2.5, and mean arm span minus height is close to -6 cm. In children with <i>ACAN</i> haploinsufficiency mean sitting height/height ratio SDS $\approx$ +1.6 and arm span equals height.                                 |
| Ratio upper/lower arm, upper/lower leg                           | Relatively short upper arms and legs (rhizomelia) is suspect for <i>FGFR3</i> mutation. Relatively short forearms and lower legs (mesomelia) is suspect for <i>SHOX</i> or <i>NPR2</i> haploinsufficiency or Robinow S, but is also compatible with hypochondroplasia                                                                                  |
| Head circumference                                               | Microcephaly is compatible with <i>IGF1R</i> and <i>IGF1</i> mutations, foetal alcohol S, and multiple dysmorphic syndromes (e.g. Seckel S, MOPD). Relative macrocephaly (in comparison to height SDS) is seen in Silver-Russell S, Turner S, Robinow S, 3M S and <i>NF1</i> mutations                                                                 |
| Weight for age, weight for height, BMI                           | <u>Underweight</u> : malnutrition, coeliac disease, cystic fibrosis, chronic intestinal disorders [such as inflammatory bowel disease (IBD)], hypocortisolism, metabolic disorders, SGA, Silver-Russell S. <u>Overweight/obesity</u> : hypothyroidism, Cushing S (centripetal obesity), GH deficiency, hypothalamic disorder, pseudohypoparathyroidism |
| <b>General impression</b>                                        |                                                                                                                                                                                                                                                                                                                                                        |
| Physical signs of parental neglect or abuse                      | Emotional deprivation, child abuse                                                                                                                                                                                                                                                                                                                     |
| Absent subcutaneous fat                                          | Leprechaunism                                                                                                                                                                                                                                                                                                                                          |
| Little subcutaneous fat                                          | Progeria                                                                                                                                                                                                                                                                                                                                               |
| Pigmented naevi                                                  | Turner S                                                                                                                                                                                                                                                                                                                                               |
| Striae                                                           | Cushing S                                                                                                                                                                                                                                                                                                                                              |
| Hirsutism                                                        | Coffin-Sirus S, Cornelia de Lange S                                                                                                                                                                                                                                                                                                                    |
| Dysmorphic features                                              | Primary growth disorders (syndromes)                                                                                                                                                                                                                                                                                                                   |
| Blood pressure                                                   | Hypertension in chronic renal failure, Cushing S. Hypotension in hypoadrenalism                                                                                                                                                                                                                                                                        |
| Heart rate                                                       | Slow heart rate suspect for hypothyroidism                                                                                                                                                                                                                                                                                                             |
| Dermatitis herpetiformis                                         | Coeliac disease                                                                                                                                                                                                                                                                                                                                        |
| Virilisation                                                     | Cushing S                                                                                                                                                                                                                                                                                                                                              |
| <b>Global impression of the parents</b> (face, body proportions) | In case of dysmorphic features and/or abnormal body proportions (sitting height/height, arm span minus height, rhizomelia or mesomelia), suspect dominant syndrome or skeletal dysplasia)                                                                                                                                                              |
| <b>Head</b>                                                      |                                                                                                                                                                                                                                                                                                                                                        |
| Alopecia                                                         | Progeria                                                                                                                                                                                                                                                                                                                                               |
| Coarse face                                                      | Coffin-Sirus S                                                                                                                                                                                                                                                                                                                                         |
| Hypoplastic face                                                 | Seckel S                                                                                                                                                                                                                                                                                                                                               |
| Narrow face                                                      | Dubowitz S                                                                                                                                                                                                                                                                                                                                             |
| Facial teleangiectasias                                          | Bloom S                                                                                                                                                                                                                                                                                                                                                |
| Frontal bossing, mid-facial hypoplasia, triangular face          | GH deficiency or insensitivity, Silver-Russell S, 3M S                                                                                                                                                                                                                                                                                                 |
| Round, plethoric “moon” face                                     | Cushing S                                                                                                                                                                                                                                                                                                                                              |
| Hypertelorism                                                    | Aarskog S, Robinow S                                                                                                                                                                                                                                                                                                                                   |
| Broad nasal bridge                                               | Dubowitz S                                                                                                                                                                                                                                                                                                                                             |
| Nasal hypoplasia                                                 | Hallerman-Streiff S                                                                                                                                                                                                                                                                                                                                    |
| Prominent nose                                                   | Seckel S, Floating Harbor S                                                                                                                                                                                                                                                                                                                            |
| Anteverted nares, depressed nasal bridge                         | 3M S                                                                                                                                                                                                                                                                                                                                                   |
| Heavy and continuous eyebrows                                    | Cornelia de Lange S                                                                                                                                                                                                                                                                                                                                    |
| Supraorbital crease                                              | Dubowitz S                                                                                                                                                                                                                                                                                                                                             |
| Periorbital fat accumulation                                     | Williams S                                                                                                                                                                                                                                                                                                                                             |
| Cataract                                                         | Hallerman-Streiff S                                                                                                                                                                                                                                                                                                                                    |

|                                                               |                                                                                                                                                                                                                                    |
|---------------------------------------------------------------|------------------------------------------------------------------------------------------------------------------------------------------------------------------------------------------------------------------------------------|
| Epicanthus                                                    | Down S, Turner S                                                                                                                                                                                                                   |
| Ptosis                                                        | Noonan S, Aarskog S, Dubowitz S, Turner S                                                                                                                                                                                          |
| Almond-shaped eyes                                            | Prader-Willi S                                                                                                                                                                                                                     |
| Fundoscopy: retinal abnormalities                             | Cockayne S                                                                                                                                                                                                                         |
| Fundoscopy: papilloedema, visual field defects, optic atrophy | CNS Tumour (e.g. craniopharyngioma) or space-occupying process                                                                                                                                                                     |
| Long philtrum                                                 | Williams S                                                                                                                                                                                                                         |
| Partial anodonty                                              | Williams S                                                                                                                                                                                                                         |
| 'carp' mouth                                                  | Cornelia de Lange S                                                                                                                                                                                                                |
| Large lips                                                    | Coffin-Sirius S                                                                                                                                                                                                                    |
| Full fleshy lips                                              | 3M S                                                                                                                                                                                                                               |
| Hypoplasia of the teeth                                       | Hallerman-Streiff S                                                                                                                                                                                                                |
| Prominent lips                                                | Williams S                                                                                                                                                                                                                         |
| Mouth ulcers                                                  | Coeliac disease                                                                                                                                                                                                                    |
| Tonsils                                                       | Tonsillar hypertrophy and enlarged adenoid can cause growth failure in infants and toddlers                                                                                                                                        |
| Voice pitch                                                   | High-pitched voice is compatible with GH deficiency or 3M S. Low-pitched voice with hyperandrogenism                                                                                                                               |
| Hypoplasia of the jaw                                         | Hallerman-Streiff S, Rubinstein-Taybi S                                                                                                                                                                                            |
| Micrognathia                                                  | Dubowitz S                                                                                                                                                                                                                         |
| Narrow mandibula                                              | Turner S                                                                                                                                                                                                                           |
| Dysmorphic or rotated ears                                    | Turner S, Noonan S                                                                                                                                                                                                                 |
| <b>Neck</b>                                                   |                                                                                                                                                                                                                                    |
| Low posterior hairline                                        | Turner S                                                                                                                                                                                                                           |
| Webbed neck                                                   | Turner S, Noonan S                                                                                                                                                                                                                 |
| Increased dorsal fat pad ('buffalo hump')                     | Cushing S                                                                                                                                                                                                                          |
| Thyroidal size                                                | Enlarged or small thyroid in Hashimoto thyroiditis                                                                                                                                                                                 |
| <b>Thorax</b>                                                 |                                                                                                                                                                                                                                    |
| Gynaecomastia                                                 | prolactinoma                                                                                                                                                                                                                       |
| Broad chest                                                   | Turner S                                                                                                                                                                                                                           |
| Inverted/Hypoplastic or wide-spaced nipples                   | Turner S                                                                                                                                                                                                                           |
| Pectus excavatum                                              | Turner S                                                                                                                                                                                                                           |
| Cardiac murmur                                                | Suspect for congenital heart disease: aortic coarctation in Turner syndrome, pulmonary artery stenosis in Noonan S                                                                                                                 |
| <b>Abdomen</b>                                                |                                                                                                                                                                                                                                    |
| Lobulated abdominal fat                                       | GH deficiency                                                                                                                                                                                                                      |
| Distended abdomen                                             | Coeliac disease                                                                                                                                                                                                                    |
| Hepatomegaly, splenomegaly                                    | Liver disorder, metabolic disorder                                                                                                                                                                                                 |
| <b>Genitalia</b>                                              |                                                                                                                                                                                                                                    |
| Tanner stages                                                 | Assessment of pubertal timing (early, normal, late), assessment of inconsistencies in external pubertal signs (e.g., delayed pubic hair and penile growth in contrast to normal or advanced testicular growth in IGSF1 deficiency) |
| Micropenis                                                    | Hypogonadism, hypopituitarism, various syndromes (e.g. Prader-Willi S, Robinow S, Smith-Lemli-Opitz S)                                                                                                                             |
| Shawl scrotum                                                 | Aarskog S                                                                                                                                                                                                                          |
| Cryptorchidism                                                | Hypogonadism, 45,X/46,XY, Noonan S, various other syndromes (Prader-Willi S, Rubinstein-Taybi S)                                                                                                                                   |
| Ambiguous genitalia                                           | 45,X/46,XY                                                                                                                                                                                                                         |
| <b>Skeleton/muscles</b>                                       |                                                                                                                                                                                                                                    |
| Limb asymmetry                                                | Silver-Russell S                                                                                                                                                                                                                   |
| Hip dislocation                                               | Turner S                                                                                                                                                                                                                           |
| Proximal muscle weakness                                      | Cushing S                                                                                                                                                                                                                          |
| Knee disorder                                                 | Turner S                                                                                                                                                                                                                           |

|                                     |                                                                                |
|-------------------------------------|--------------------------------------------------------------------------------|
| Hyperlaxity                         | Down S, 3M S                                                                   |
| Short arms and legs                 | Skeletal dysplasias                                                            |
| Madelung deformity                  | <i>SHOX</i> haploinsufficiency                                                 |
| Short forearms                      | <i>SHOX</i> haploinsufficiency, <i>NPR2</i> haploinsufficiency, Robinow S      |
| Muscular hypotony or atrophy        | Prader-Willi S, Down S, muscle disorder, mitochondrial disorders, glycogenoses |
| Muscular hypertrophy                | <i>SHOX</i> haploinsufficiency                                                 |
| Cubitus valgus or ulnar dislocation | Turner S, <i>SHOX</i> or <i>NPR2</i> haploinsufficiency                        |
| <b>Hand/foot</b>                    |                                                                                |
| Small hands and feet                | Prader-Willi S, <i>NPPC</i> haploinsufficiency                                 |
| Lymphoedema of hands and feet       | Turner S                                                                       |
| Hand anomalies                      | Aarskog S                                                                      |
| Hypoplastic nails                   | Turner S                                                                       |
| Syndactyly                          | Rubinstein-Taybi S, Smith-Lemni-Opitz S                                        |
| Clinodactyly                        | Silver-Russell S                                                               |
| Absent toe-nails                    | Coffin-Sirus S                                                                 |

Abbreviations: MOPD, Microcephalic Osteodysplastic Primordial Dwarfism; S, syndrome; TH, target height

If an abnormal anatomical feature is encountered, one can search the London Medical Database for syndromes associated with that feature. A description and pictures of the most frequent dysmorphic features can be found in Am J Medical Genetics (Special issue: elements of morphology: standard terminology):

<https://onlinelibrary.wiley.com/toc/15524833/149A/1>

**Supplementary Table 4. Diagnostic yield (%) in (relatively) high-income countries**

|                     | United States<br>1994<br>[75] | Taiwan<br>2002<br>[66] | Brasil<br>2005<br>[67] | Nether-<br>lands<br>2008<br>[63] | Greece<br>2012<br>[70] | United<br>states<br>2013<br>[71] | Nether-<br>lands<br>2015<br>[64] | Nether-<br>lands<br>2016<br>[65] |
|---------------------|-------------------------------|------------------------|------------------------|----------------------------------|------------------------|----------------------------------|----------------------------------|----------------------------------|
| n                   | 555                           | 655                    | 99                     | 542                              | 295                    | 235                              | 131                              | 182<br>(adol)                    |
| SGA                 |                               | <b>15.3</b>            | <b>14</b>              | <b>14.8</b>                      | <b>5.4</b>             |                                  | <b>3.8</b>                       | <b>1.1</b>                       |
| Turner/<br>girls    | 3.0                           | 10.1                   |                        | 1.2                              | 1.5                    |                                  | 1.8                              | 1.2                              |
| Syndromes           |                               | 3.1                    | 9                      | 1.1                              | 5.1                    | 0.4                              | 3.8                              | 0.6                              |
| GHD                 | 2.8                           | 7.9                    | 2                      | 1.1                              | 10.2                   |                                  | 1.5                              | 0.6                              |
| Hypothy-<br>roidism | 0.5                           | 0.3                    |                        |                                  |                        |                                  | 0.8                              | 0.6                              |
| Coeliac<br>disease  |                               |                        |                        | 1.3                              | 1.0                    | 0.9                              | 3.1                              | 1.1                              |
| Other               | 9.5                           |                        | 4                      | 0.7                              |                        |                                  | 3.8                              | 2.7                              |
| Total<br>pathology  | <b>14.1</b>                   | <b>21.4</b>            | <b>15</b>              | <b>4.8</b>                       | <b>16.9</b>            | <b>1.3</b>                       | <b>14.8</b>                      | <b>7.1</b>                       |

## References

- 1 Brouwers MC, Kho ME, Browman GP, Burgers JS, Cluzeau F, Feder G, Fervers B, Graham ID, Grimshaw J, Hanna SE, Littlejohns P, Makarski J, Zitzelsberger L, Consortium ANS: AGREE II: advancing guideline development, reporting and evaluation in health care. *CMAJ* 2010;182:E839-842.
- 2 Fredriks AM, Van Buuren S, Jeurissen SE, Dekker FW, Verloove-Vanhorick SP, Wit JM: Height, weight, body mass index and pubertal development reference values for children of Turkish origin in the Netherlands. *Eur J Pediatr* 2003;162:788-793.
- 3 Fredriks AM, Van Buuren S, Jeurissen SE, Dekker FW, Verloove-Vanhorick SP, Wit JM: Height, weight, body mass index and pubertal development references for children of Moroccan origin in The Netherlands. *Acta Paediatr* 2004;93:817-824.
- 4 Schonbeck Y, Van Dommelen P, Hirasing RA, Van Buuren S: Trend in height of Turkish and Moroccan children living in the Netherlands. *PLoS One* 2015;10:e0124686.
- 5 Bogin B, Hermanussen M, Scheffler C: As tall as my peers - similarity in body height between migrants and hosts. *Anthropol Anz* 2018;74:365-376.
- 6 Schonbeck Y, Talma H, Van Dommelen P, Bakker B, Buitendijk SE, Hirasing RA, Van Buuren S: The world's tallest nation has stopped growing taller: the height of Dutch children from 1955 to 2009. *Pediatr Res* 2013;73:371-377.
- 7 WHO Child Growth Standards based on length/height, weight and age. *Acta Paediatr Suppl* 2006;450:76-85.
- 8 WHO: Child growth standards. Geneva, WHO, 2011,
- 9 Grasgruber P, Sebera M, Hrazdira E, Cacek J, Kalina T: Major correlates of male height: A study of 105 countries. *Econ Hum Biol* 2016;21:172-195.
- 10 Wright CM, Cheetham TD: The strengths and limitations of parental heights as a predictor of attained height. *Arch Dis Child* 1999;81:257-260.
- 11 Tanner JM, Goldstein H, Whitehouse RH: Standards for Children's Height at Ages 2-9 Years Allowing for Height of Parents. *Arch Dis Child* 1970;45:755-762.
- 12 Hermanussen M, Cole J: The calculation of target height reconsidered. *Horm Res* 2003;59:180-183.
- 13 Van Dommelen P, Schonbeck Y, Van Buuren S: A simple calculation of the target height. *Arch Dis Child* 2012;97:182.
- 14 Cohen P, Rogol AD, Deal CL, Saenger P, Reiter EO, Ross JL, Chernausek SD, Savage MO, Wit JM: Consensus statement on the diagnosis and treatment of children with idiopathic short stature: a summary of the Growth Hormone Research Society, the Lawson Wilkins Pediatric Endocrine Society, and the European Society for Paediatric Endocrinology Workshop. *J Clin Endocrinol Metab* 2008;93:4210-4217.
- 15 Saari A, Harju S, Makitie O, Saha MT, Dunkel L, Sankilampi U: Systematic growth monitoring for the early detection of celiac disease in children. *JAMA Pediatr* 2015;169:e1525.
- 16 Rogol AD, Hayden GF: Etiologies and early diagnosis of short stature and growth failure in children and adolescents. *J Pediatr* 2014;164:S1-14 e16.
- 17 Bakker B, Frane J, Anhalt H, Lippe B, Rosenfeld RG: Height velocity targets from the national cooperative growth study for first-year growth hormone responses in short children. *J Clin Endocrinol Metab* 2008;93:352-357.
- 18 Tanner JM, Whitehouse RH: Clinical longitudinal standards for height, weight, height velocity, weight velocity, and stages of puberty. *Arch Dis Child* 1976;51:170-179.
- 19 Karlberg J, Engström I, Karlberg P, Fryer JG: Analysis of Linear Growth Using a Mathematical Model. I. From Birth to Three Years. *Acta Paed Scand* 1987;76:478-488.
- 20 Karlberg J, Fryer JG, Engström I, Karlberg P: Analysis of Linear Growth Using a Mathematical Model. II. From 3 to 21 Years of Age. *Acta Paed Scand [Suppl]* 1987;337:12-29.

- 21 Prader A, Largo RH, Molinari L, Issler C: Physical growth of Swiss children from birth to 20 years of age. First Zurich longitudinal study of growth and development. *Helv Paediat Acta*[Suppl] 1989;52:1-125.
- 22 Tanner JM: Growth at adolescence, ed 2nd. Oxford, Blackwell Scientific Publications, 1962.
- 23 Hermanussen M, Largo RH, Molinari L: Canalisation in human growth: a widely accepted concept reconsidered. *Eur J Pediatr* 2001;160:163-167.
- 24 Grote FK, Van Dommelen P, Oostdijk W, De Muinck Keizer-Schrama SM, Verkerk PH, Wit JM, Van Buuren S: Developing evidence-based guidelines for referral for short stature. *Arch Dis Child* 2008;93:212-217.
- 25 Scherdel P, Matczak S, Leger J, Martinez-Vinson C, Goulet O, Brauner R, Nicklaus S, Resche-Rigon M, Chalumeau M, Heude B: Algorithms to Define Abnormal Growth in Children: External Validation and Head-To-Head Comparison. *J Clin Endocrinol Metab* 2019;104:241-249.
- 26 Ranke MB: Towards a Consensus on the Definition of Idiopathic Short Stature. Summary. *Horm Res* 1996;45 (suppl 2):64-66.
- 27 Rekers Mombarg LT, Wit JM, Massa GG, Ranke MB, Buckler JM, Butenandt O, Chaussain JL, Frisch H, Leiberman E: Spontaneous growth in idiopathic short stature. European Study Group. *Arch Dis Child* 1996;75:175-180.
- 28 Wit JM, Ranke MB, Kelnar CJH: ESPE Classification of Paediatric Endocrine Diagnoses. *Horm Res* 2007;68(suppl 2):1-120.
- 29 ICPED C: International Classification of Pediatric Endocrine Diagnoses; in Ranke MBQ, C.A. (ed). Rotterdam, Growth Analyser, 2016,
- 30 Wood AR, Esko T, Yang J, Vedantam S, Pers TH, Gustafsson S, Chu AY, Estrada K, Luan J, Kutalik Z, Amin N, Buchkovich ML, Croteau-Chonka DC, Day FR, Duan Y, Fall T, Fehrmann R, Ferreira T, Jackson AU, Karjalainen J, Lo KS, Locke AE, Magi R, Mihailov E, Porcu E, Randall JC, Scherag A, Vinkhuyzen AA, Westra HJ, Winkler TW, Workalemahu T, Zhao JH, Absher D, Albrecht E, Anderson D, Baron J, Beekman M, Demirkan A, Ehret GB, Feenstra B, Feitosa MF, Fischer K, Fraser RM, Goel A, Gong J, Justice AE, Kanoni S, Kleber ME, Kristiansson K, Lim U, Lotay V, Lui JC, Mangino M, Mateo L, I, Medina-Gomez C, Nalls MA, Nyholt DR, Palmer CD, Pasko D, Pechlivanis S, Prokopenko I, Ried JS, Ripke S, Shungin D, Stancakova A, Strawbridge RJ, Sung YJ, Tanaka T, Teumer A, Trompet S, van der Laan SW, van SJ, Van Vliet-Ostaptchouk JV, Wang Z, Yengo L, Zhang W, Afzal U, Arnlöv J, Arscott GM, Bandinelli S, Barrett A, Bellis C, Bennett AJ, Berne C, Bluher M, Bolton JL, Bottcher Y, Boyd HA, Bruinenberg M, Buckley BM, Buyske S, Caspersen IH, Chines PS, Clarke R, Claudi-Boehm S, Cooper M, Daw EW, De Jong PA, Deelen J, Delgado G, Denny JC, Dhonukshe-Rutten R, Dimitriou M, Doney AS, Dorr M, Eklund N, Eury E, Folkersen L, Garcia ME, Geller F, Giedraitis V, Go AS, Grallert H, Grammer TB, Grassler J, Gronberg H, de Groot LC, Groves CJ, Haessler J, Hall P, Haller T, Hallmans G, Hannemann A, Hartman CA, Hassinen M, Hayward C, Heard-Costa NL, Helmer Q, Hemani G, Henders AK, Hillege HL, Hlatky MA, Hoffmann W, Hoffmann P, Holmen O, Houwing-Duistermaat JJ, Illig T, Isaacs A, James AL, Jeff J, Johansen B, Johansson A, Jolley J, Juliusdottir T, Junttila J, Kho AN, Kinnunen L, Klopp N, Kocher T, Kratzer W, Lichtner P, Lind L, Lindstrom J, Lobbens S, Lorentzon M, Lu Y, Lyssenko V, Magnusson PK, Mahajan A, Maillard M, McArdle WL, McKenzie CA, McLachlan S, McLaren PJ, Menni C, Merger S, Milani L, Moayyeri A, Monda KL, Morken MA, Muller G, Muller-Nurasyid M, Musk AW, Narisu N, Nauck M, Nolte IM, Nothen MM, Oozageer L, Pilz S, Rayner NW, Renstrom F, Robertson NR, Rose LM, Roussel R, Sanna S, Scharnagl H, Scholtens S, Schumacher FR, Schunkert H, Scott RA, Sehmi J, Seufferlein T, Shi J, Silventoinen K, Smit JH, Smith AV, Smolonska J, Stanton AV, Stirrups K, Stott DJ, Stringham HM, Sundstrom J, Swertz MA, Syvanen AC, Tayo BO, Thorleifsson G, Tyrer JP, van DS, van Schoor NM, van d, V, van HD, van Oort FV, Vermeulen SH, Verweij N, Vonk JM, Waite LL, Waldenberger M, Wennauer R, Wilkens LR, Willenborg C, Wilsgaard T, Wojczynski MK, Wong A, Wright AF, Zhang Q, Arveiler D, Bakker SJ, Beilby J, Bergman RN, Bergmann S, Biffar R, Blangero J, Boomsma DI, Bornstein SR, Bovet P, Brambilla P, Brown MJ, Campbell H, Caulfield MJ, Chakravarti A, Collins R, Collins FS, Crawford DC, Cupples LA, Danesh J, de FU, den Ruijter HM, Erbel R, Erdmann J, Eriksson JG, Farrall M, Ferrannini E, Ferrieres J, Ford I, Forouhi NG:

Defining the role of common variation in the genomic and biological architecture of adult human height. *Nat Genet* 2014;46:1173-1186.

31 Marouli E, Graff M, Medina-Gomez C, Lo KS, Wood AR, Kjaer TR, Fine RS, Lu Y, Schurmann C, Highland HM, Rueger S, Thorleifsson G, Justice AE, Lamparter D, Stirrups KE, Turcot V, Young KL, Winkler TW, Esko T, Karaderi T, Locke AE, Masca NG, Ng MC, Mudgal P, Rivas MA, Vedantam S, Mahajan A, Guo X, Abecasis G, Aben KK, Adair LS, Alam DS, Albrecht E, Allin KH, Allison M, Amouyel P, Appel EV, Arveiler D, Asselbergs FW, Auer PL, Balkau B, Banas B, Bang LE, Benn M, Bergmann S, Bielak LF, Bluher M, Boeing H, Boerwinkle E, Boger CA, Bonnycastle LL, Bork-Jensen J, Bots ML, Bottinger EP, Bowden DW, Brandslund I, Breen G, Brilliant MH, Broer L, Burt AA, Butterworth AS, Carey DJ, Caulfield MJ, Chambers JC, Chasman DI, Chen YI, Chowdhury R, Christensen C, Chu AY, Cocca M, Collins FS, Cook JP, Corley J, Galbany JC, Cox AJ, Cuellar-Partida G, Danesh J, Davies G, de Bakker PI, de Borst GJ, de Denus S, de Groot MC, de Mutsert R, Deary IJ, Dedoussis G, Demerath EW, den Hollander AI, Dennis JG, Di Angelantonio E, Drenos F, Du M, Dunning AM, Easton DF, Ebeling T, Edwards TL, Ellinor PT, Elliott P, Evangelou E, Farmaki AE, Faul JD, Feitosa MF, Feng S, Ferrannini E, Ferrario MM, Ferrieres J, Florez JC, Ford I, Fornage M, Franks PW, Frikke-Schmidt R, Galesloot TE, Gan W, Gandin I, Gasparini P, Giedraitis V, Giri A, Girotto G, Gordon SD, Gordon-Larsen P, Gorski M, Grarup N, Grove ML, Gudnason V, Gustafsson S, Hansen T, Harris KM, Harris TB, Hattersley AT, Hayward C, He L, Heid IM, Heikkila K, Helgeland O, Hernesniemi J, Hewitt AW, Hocking LJ, Hollensted M, Holmen OL, Hovingh GK, Howson JM, Hoyng CB, Huang PL, Hveem K, Ikram MA, Ingelsson E, Jackson AU, Jansson JH, Jarvik GP, Jensen GB, Jhun MA, Jia Y, Jiang X, Johansson S, Jorgensen ME, Jorgensen T, Jousilahti P, Jukema JW, Kahali B, Kahn RS, Kahonen M, Kamstrup PR, Kanoni S, Kaprio J, Karaleftheri M, Kardia SL, Karpe F, Kee F, Keeman R, Kiemeny LA, Kitajima H, Kluivers KB, Kocher T, Komulainen P, Kontto J, Kooner JS, Kooperberg C, Kovacs P, Kriebel J, Kuivaniemi H, Kury S, Kuusisto J, La Bianca M, Laakso M, Lakka TA, Lange EM, Lange LA, Langefeld CD, Langenberg C, Larson EB, Lee IT, Lehtimäki T, Lewis CE, Li H, Li J, Li-Gao R, Lin H, Lin LA, Lin X, Lind L, Lindstrom J, Linneberg A, Liu Y, Liu Y, Lophatananon A, Luan J, Lubitz SA, Lyytikäinen LP, Mackey DA, Madden PA, Manning AK, Mannisto S, Marenne G, Marten J, Martin NG, Mazul AL, Meidtner K, Metspalu A, Mitchell P, Mohlke KL, Mook-Kanamori DO, Morgan A, Morris AD, Morris AP, Muller-Nurasyid M, Munroe PB, Nalls MA, Nauck M, Nelson CP, Neville M, Nielsen SF, Nikus K, Njolstad PR, Nordestgaard BG, Ntalla I, O'Connell JR, Oksa H, Loohuis LM, Ophoff RA, Owen KR, Packard CJ, Padmanabhan S, Palmer CN, Pasterkamp G, Patel AP, Pattie A, Pedersen O, Peissig PL, Peloso GM, Pennell CE, Perola M, Perry JA, Perry JR, Person TN, Pirie A, Polasek O, Posthuma D, Raitakari OT, Rasheed A, Rauramaa R, Reilly DF, Reiner AP, Renstrom F, Ridker PM, Rioux JD, Robertson N, Robino A, Rolandsson O, Rudan I, Ruth KS, Saleheen D, Salomaa V, Samani NJ, Sandow K, Sapkota Y, Sattar N, Schmidt MK, Schreiner PJ, Schulze MB, Scott RA, Segura-Lepe MP, Shah S, Sim X, Sivapalaratnam S, Small KS, Smith AV, Smith JA, Southam L, Spector TD, Speliotes EK, Starr JM, Steinthorsdottir V, Stringham HM, Stumvoll M, Surendran P, Tanaka LM, Tansey KE, Tardif JC, Taylor KD, Teumer A, Thompson DJ, Thorsteinsdottir U, Thuesen BH, Tonjes A, Tromp G, Trompet S, Tsafantakis E, Tuomilehto J, Tybjaerg-Hansen A, Tyrer JP, Uher R, Uitterlinden AG, Ulivi S, van der Laan SW, Van Der Leij AR, van Duijn CM, van Schoor NM, van Setten J, Varbo A, Varga TV, Varma R, Edwards DR, Vermeulen SH, Vestergaard H, Vitart V, Vogt TF, Vozzi D, Walker M, Wang F, Wang CA, Wang S, Wang Y, Wareham NJ, Warren HR, Wessel J, Willems SM, Wilson JG, Witte DR, Woods MO, Wu Y, Yaghoobkar H, Yao J, Yao P, Yerges-Armstrong LM, Young R, Zeggini E, Zhan X, Zhang W, Zhao JH, Zhao W, Zhao W, Zheng H, Zhou W, Consortium EP-I, Consortium CHDE, Exome BPC, Consortium TD-G, Go TDGC, Global Lipids Genetics C, ReproGen C, Investigators M, Rotter JI, Boehnke M, Kathiresan S, McCarthy MI, Willer CJ, Stefansson K, Borecki IB, Liu DJ, North KE, Heard-Costa NL, Pers TH, Lindgren CM, Oxvig C, Kutalik Z, Rivadeneira F, Loos RJ, Frayling TM, Hirschhorn JN, Deloukas P, Lettre G: Rare and low-frequency coding variants alter human adult height. *Nature* 2017;542:186-190.

32 Collett-Solberg PF, Jorge AAL, Boguszewski MCS, Miller BS, Choong CSY, Cohen P, Hoffman AR, Luo X, Radovick S, Saenger P: Growth hormone therapy in children; research and practice - A review. *Growth Horm IGF Res* 2019;44:20-32.



- 33 Huang B, Thangavelu M, Bhatt S, C JS, Wang S: Prenatal diagnosis of 45,X and 45,X mosaicism: the need for thorough cytogenetic and clinical evaluations. *Prenat Diagn* 2002;22:105-110.
- 34 Scherdel P, Reynaud R, Pietrement C, Salaun JF, Bellaiche M, Arnould M, Chevallier B, Piloquet H, Jobez E, Cheymol J, Bichara E, group Els, Heude B, Chalumeau M: Priority target conditions for algorithms for monitoring children's growth: Interdisciplinary consensus. *PLoS One* 2017;12:e0176464.
- 35 Gicquel C, Gaston V, Cabrol S, Le Bouc Y: Assessment of Turner's syndrome by molecular analysis of the X chromosome in growth-retarded girls. *J Clin Endocrinol Metab* 1998;83:1472-1476.
- 36 Grandone A, Del Vecchio Blanco F, Torella A, Caruso M, De Luca F, Di Mase R, Messina MF, Salerno MC, Sallemi A, Perone L, Marzuillo P, Miraglia Del Giudice E, Nigro V, Perrone L: Multiplex Ligation-Dependent Probe Amplification Accurately Detects Turner Syndrome in Girls with Short Stature. *Horm Res Paediatr* 2016;86:330-336.
- 37 Gravholt CH, Andersen NH, Conway GS, Dekkers OM, Geffner ME, Klein KO, Lin AE, Mauras N, Quigley CA, Rubin K, Sandberg DE, Sas TCJ, Silberbach M, Soderstrom-Anttila V, Stockholm K, van Alfen-van derVelden JA, Woelfle J, Backeljauw PF, International Turner Syndrome Consensus G: Clinical practice guidelines for the care of girls and women with Turner syndrome: proceedings from the 2016 Cincinnati International Turner Syndrome Meeting. *Eur J Endocrinol* 2017;177:G1-G70.
- 38 Huang YC, Lee CT, Wu MZ, Liu SY, Tung YC, Ho HN, Tsai WY: The spectrum of 45,X/46,XY mosaicism in Taiwanese children: The experience of a single center. *J Formos Med Assoc* 2018
- 39 Corsello G, Antona V, Serra G, Zara F, Giambrone C, Lagalla L, Piccione M, Piro E: Clinical and molecular characterization of 112 single-center patients with Neurofibromatosis type 1. *Ital J Pediatr* 2018;44:45.
- 40 Mendez HM, Opitz JM: Noonan syndrome: a review. *Am J Med Genet* 1985;21:493-506.
- 41 Tartaglia M, Kalidas K, Shaw A, Song X, Musat DL, van der Burgt I, Brunner HG, Bertola DR, Crosby A, Ion A, Kucherlapati RS, Jeffery S, Patton MA, Gelb BD: PTPN11 mutations in Noonan syndrome: molecular spectrum, genotype-phenotype correlation, and phenotypic heterogeneity. *Am J Hum Genet* 2002;70:1555-1563.
- 42 Yart A, Edouard T: Noonan syndrome: an update on growth and development. *Curr Opin Endocrinol Diabetes Obes* 2018;25:67-73.
- 43 Gillentine MA, Lupo PJ, Stankiewicz P, Schaaf CP: An estimation of the prevalence of genomic disorders using chromosomal microarray data. *J Hum Genet* 2018;63:795-801.
- 44 Wakeling EL, Brioude F, Lokulo-Sodipe O, O'Connell SM, Salem J, Blik J, Canton AP, Chrzanowska KH, Davies JH, Dias RP, Dubern B, Elbracht M, Giabicani E, Grimberg A, Gronskov K, Hokken-Koelega AC, Jorge AA, Kagami M, Linglart A, Maghnie M, Mohnike K, Monk D, Moore GE, Murray PG, Ogata T, Petit IO, Russo S, Said E, Toumba M, Tumer Z, Binder G, Eggermann T, Harbison MD, Temple IK, Mackay DJ, Netchine I: Diagnosis and management of Silver-Russell syndrome: first international consensus statement. *Nat Rev Endocrinol* 2017;13:105-124.
- 45 Waller DK, Correa A, Vo TM, Wang Y, Hobbs C, Langlois PH, Pearson K, Romitti PA, Shaw GM, Hecht JT: The population-based prevalence of achondroplasia and thanatophoric dysplasia in selected regions of the US. *Am J Med Genet A* 2008;146A:2385-2389.
- 46 OMIM: OMIM, John Hopkins University, 1968, 2018,
- 47 Rosilio M, Huber-Lequesne C, Sapin H, Carel JC, Blum WF, Cormier-Daire V: Genotypes and phenotypes of children with SHOX deficiency in France. *J Clin Endocrinol Metab* 2012;97:E1257-E1265.
- 48 Shima H, Tanaka T, Kamimaki T, Dateki S, Muroya K, Horikawa R, Kanno J, Adachi M, Naiki Y, Tanaka H, Mabe H, Yagasaki H, Kure S, Matsubara Y, Tajima T, Kashimada K, Ishii T, Asakura Y, Fujiwara I, Soneda S, Nagasaki K, Hamajima T, Kanzaki S, Jinno T, Ogata T, Fukami M, Japanese Ssg: Systematic molecular analyses of SHOX in Japanese patients with idiopathic short stature and Leri-Weill dyschondrosteosis. *J Hum Genet* 2016;61:585-591.

- 49 Rappold G, Blum WF, Shavrikova EP, Crowe BJ, Roeth R, Quigley CA, Ross JL, Niesler B: Genotypes and phenotypes in children with short stature: clinical indicators of SHOX haploinsufficiency. *J Med Genet* 2007;44:306-313.
- 50 Vasques GA, Amano N, Docko AJ, Funari MF, Quedas EP, Nishi MY, Arnhold IJ, Hasegawa T, Jorge AA: Heterozygous mutations in natriuretic peptide receptor-B (NPR2) gene as a cause of short stature in patients initially classified as idiopathic short stature. *J Clin Endocrinol Metab* 2013;98:E1636-E1644.
- 51 Amano N, Mukai T, Ito Y, Narumi S, Tanaka T, Yokoya S, Ogata T, Hasegawa T: Identification and Functional Characterization of Two Novel NPR2 Mutations in Japanese Patients With Short Stature. *J Clin Endocrinol Metab* 2014;99:E713-E718.
- 52 Hisado-Oliva A, Garre-Vazquez AI, Santaolalla-Caballero F, Belinchon A, Barreda-Bonis AC, Vasques GA, Ramirez J, Luzuriaga C, Carlone G, Gonzalez-Casado I, Benito-Sanz S, Jorge AA, Campos-Barros A, Heath KE: Heterozygous NPR2 mutations cause disproportionate short stature, similar to Leri-Weill dyschondrosteosis. *J Clin Endocrinol Metab* 2015;jc20151612.
- 53 Wang SR, Jacobsen CM, Carmichael H, Edmund AB, Robinson JW, Olney RC, Miller TC, Moon JE, Mericq V, Potter LR, Warman ML, Hirschhorn JN, Dauber A: Heterozygous mutations in natriuretic peptide receptor-B (NPR2) gene as a cause of short stature. *Hum Mutat* 2015;36:474-481.
- 54 Hattori A, Katoh-Fukui Y, Nakamura A, Matsubara K, Kamimaki T, Tanaka H, Dateki S, Adachi M, Muroya K, Yoshida S, Ida S, Mitani M, Nagasaki K, Ogata T, Suzuki E, Hata K, Nakabayashi K, Matsubara Y, Narumi S, Tanaka T, Fukami M: Next generation sequencing-based mutation screening of 86 patients with idiopathic short stature. *Endocr J* 2017;64:947-954.
- 55 Hauer NN, Popp B, Schoeller E, Schuhmann S, Heath KE, Hisado-Oliva A, Klinger P, Kraus C, Trautmann U, Zenker M, Zweier C, Wiesener A, Abou Jamra R, Kunstmann E, Wiczorek D, Uebe S, Ferrazzi F, Buttner C, Ekici AB, Rauch A, Sticht H, Dorr HG, Reis A, Thiel CT: Clinical relevance of systematic phenotyping and exome sequencing in patients with short stature. *Genet Med* 2018;20:630-638.
- 56 Hauer NN, Sticht H, Boppudi S, Buttner C, Kraus C, Trautmann U, Zenker M, Zweier C, Wiesener A, Jamra RA, Wiczorek D, Kelkel J, Jung AM, Uebe S, Ekici AB, Rohrer T, Reis A, Dorr HG, Thiel CT: Genetic screening confirms heterozygous mutations in ACAN as a major cause of idiopathic short stature. *Sci Rep* 2017;7:12225.
- 57 Hu X, Gui B, Su J, Li H, Li N, Yu T, Zhang Q, Xu Y, Li G, Chen Y, Qing Y, Chinese Genetic Short Stature C, Li C, Luo J, Fan X, Ding Y, Li J, Wang J, Wang X, Chen S, Shen Y: Novel pathogenic ACAN variants in non-syndromic short stature patients. *Clin Chim Acta* 2017;469:126-129.
- 58 van der Steen M, Pfundt R, Maas S, Bakker-van Waarde WM, Odink RJ, Hokken-Koelega ACS: ACAN Gene Mutations in Short Children Born SGA and Response to Growth Hormone Treatment. *J Clin Endocrinol Metab* 2017;102:1458-1467.
- 59 Gkourogianni A, Andrew M, Tyzinski L, Crocker M, Douglas J, Dunbar N, Fairchild J, Funari MF, Heath KE, Jorge AA, Kurtzman T, LaFranchi S, Lalani S, Lebl J, Lin Y, Los E, Newbern D, Nowak C, Olson M, Popovic J, Pruhova S, Elblova L, Quintos JB, Segerlund E, Sentchordi L, Shinawi M, Stattin EL, Swartz J, Angel AG, Cuellar SD, Hosono H, Sanchez-Lara PA, Hwa V, Baron J, Nilsson O, Dauber A: Clinical Characterization of Patients With Autosomal Dominant Short Stature due to Aggreacan Mutations. *J Clin Endocrinol Metab* 2017;102:460-469.
- 60 Vasques GA, Funari MFA, Ferreira FM, Aza-Carmona M, Sentchordi-Montane L, Barraza-Garcia J, Lerario AM, Yamamoto GL, Naslavsky MS, Duarte YAO, Bertola DR, Heath KE, Jorge AAL: IHH Gene Mutations Causing Short Stature With Nonspecific Skeletal Abnormalities and Response to Growth Hormone Therapy. *J Clin Endocrinol Metab* 2018;103:604-614.
- 61 Hisado-Oliva A, Ruzafa-Martin A, Sentchordi L, Funari MFA, Bezanilla-Lopez C, Alonso-Bernaldez M, Barraza-Garcia J, Rodriguez-Zabala M, Lerario AM, Benito-Sanz S, Aza-Carmona M, Campos-Barros A, Jorge AAL, Heath KE: Mutations in C-natriuretic peptide (NPPC): a novel cause of autosomal dominant short stature. *Genet Med* 2018;20:91-97.

- 62 Homma TK, Krepischi ACV, Furuya TK, Honjo RS, Malaquias AC, Bertola DR, Costa SS, Canton AP, Roela RA, Freire BL, Kim CA, Rosenberg C, Jorge AAL: Recurrent Copy Number Variants Associated with Syndromic Short Stature of Unknown Cause. *Horm Res Paediatr* 2018;89:13-21.
- 63 Grote FK, Oostdijk W, De Muinck Keizer-Schrama SM, Van Dommelen P, Van Buuren S, Dekker FW, Ketel AG, Moll HA, Wit JM: The diagnostic work up of growth failure in secondary health care; an evaluation of consensus guidelines. *BMC Pediatr* 2008;8:21.
- 64 Stalman SE, Hellinga I, van DP, Hennekam RC, Saari A, Sankilampi U, Dunkel L, Wit JM, Kamp GA, Plotz FB: Application of the Dutch, Finnish and British Screening Guidelines in a Cohort of Children with Growth Failure. *Horm Res Paediatr* 2015;84:376-382.
- 65 Stalman SE, Hellinga I, Wit JM, Hennekam RC, Kamp GA, Plotz FB: Growth failure in adolescents: etiology, the role of pubertal timing and most useful criteria for diagnostic workup. *J Pediatr Endocrinol Metab* 2016;29:465-473.
- 66 Shu SG, Chen YD, Chi CS: Clinical evaluation of short children referred by school screening: an analysis of 655 children. *Acta Paediatr Taiwan* 2002;43:340-344.
- 67 Strufaldi MW, Silva EM, Puccini RF: Follow-up of children and adolescents with short stature: the importance of the growth rate. *Sao Paulo Med J* 2005;123:128-133.
- 68 Bhadada SK, Bhansali A, Kochhar R, Menon AS, Sinha SK, Dutta P, Nain CK: Does every short stature child need screening for celiac disease? *J Gastroenterol Hepatol* 2008;23:e353-356.
- 69 Bhadada SK, Bhansali A, Ravikumar P, Kochhar R, Nain CK, Dutta P, Lal S: Changing scenario in aetiological profile of short stature in India-growing importance of celiac disease: a study from tertiary care centre. *Indian J Pediatr* 2011;78:41-44.
- 70 Papadimitriou A, Douros K, Papadimitriou DT, Kleanthous K, Karapanou O, Fretzayas A: Characteristics of the short children referred to an academic paediatric endocrine clinic in Greece. *J Paediatr Child Health* 2012;48:263-267.
- 71 Sisley S, Trujillo MV, Khoury J, Backeljauw P: Low Incidence of Pathology Detection and High Cost of Screening in the Evaluation of Asymptomatic Short Children. *J Pediatr* 2013;163:1045-1051.
- 72 Singh P, Sharma PK, Agnihotri A, Jyotsna VP, Das P, Gupta SD, Makharia GK, Khadgawat R: Coeliac disease in patients with short stature: A tertiary care centre experience. *Natl Med J India* 2015;28:176-180.
- 73 Lashari SK, Korejo HB, Memon YM: To determine frequency of etiological factors in short statured patients presenting at an endocrine clinic of a tertiary care hospital. *Pak J Med Sci* 2014;30:858-861.
- 74 Thomas M, Massa G, Craen M, de Zegher F, Bourguignon JP, Heinrichs C, De Schepper J, Du Caju M, Thiry-Counson G, Maes M: Prevalence and demographic features of childhood growth hormone deficiency in Belgium during the period 1986-2001. *Eur J Endocrinol* 2004;151:67-72.
- 75 Lindsay R, Feldkamp M, Harris D, Robertson J, Rallison M: Utah Growth Study: growth standards and the prevalence of growth hormone deficiency. *J Pediatr* 1994;125:29-35.
